# Supplementary material
Source: publisher figshare collection journal article supplement (https://karger.figshare.com/ndownloader/files/38312025)
Supplement: Supplementary file 1 [file 38312025]

| Table S2. Flow cytometry data of 12 samples from 11 AITL patients | | | | | | | | | | | | | | |
| --- | --- | --- | --- | --- | --- | --- | --- | --- | --- | --- | --- | --- | --- | --- |
| Case | B cells | Naïve | Memory/ Non-switched | Memory/ Switched | DN | DN_CD21-CD38- | DN_CD21-CD38+ | ASCs | Early plasmablasts | Plasmablasts | Plasma cells | IL-21 | | |
|  | (%) | (% B cells) | (% B cells) | (% B cells) | (% B cells) | (% DN cells) | (% DN cells) | (% B cells) | (% ASC cells) | (% ASC cells) | (% ASC cells) | (% CD4) | (% CD8) | (% NK) |
| 1 | 54.1 | 0.0 | 0.0 | 0.0 | 98.0 | 50.8 | 49.2 | 2.0 | 0.0 | 100.0 | 0.0 | NT | NT | NT |
| 2-1 | 5.2 | 24.1 | 45.3 | 2.3 | 18.9 | 100.0 | 0.0 | 9.4 | 80.0 | 20.0 | 0.0 | NT | NT | NT |
| 2-2 | 1.7 | 14.3 | 7.9 | 14.0 | 4.4 | 32.4 | 67.6 | 59.4 | 25.1 | 74.9 | 0.0 | 27.5 | 1.7 | 0.1 |
| 3 | 42.1 | 0.7 | 0.6 | 7.4 | 1.5 | 100.0 | 0.0 | 89.2 | 21.0 | 40.2 | 38.8 | 6.5 | 1.7 | 8.7 |
| 4 | 1.0 | 23.7 | 20.4 | 1.1 | 27.9 | 34.6 | 65.4 | 26.9 | 32.0 | 68.0 | 0.0 | 25.9 | 0.6 | 0.2 |
| 5 | 1.0 | 12.8 | 8.9 | 8.7 | 8.1 | 100.0 | 0.0 | 61.5 | 71.4 | 28.6 | 0.0 | 3.8 | 0.4 | 0.1 |
| 6 | 1.7 | 5.3 | 3.2 | 3.0 | 53.0 | 3.6 | 96.4 | 35.5 | 8.0 | 92.0 | 0.0 | 52.3 | 15.6 | 0.0 |
| 7 | 2.8 | 30.8 | 24.0 | 0.1 | 16.4 | 18.4 | 81.6 | 28.6 | 39.2 | 60.8 | 0.0 | 20.7 | 3.2 | 0.0 |
| 8 | 12.0 | 2.6 | 0.5 | 0.8 | 64.9 | 46.6 | 53.4 | 23.3 | 52.5 | 47.5 | 0.0 | 4.5 | 0.6 | 0.1 |
| 9 | 11.3 | 85.7 | 7.1 | 0.5 | 2.4 | 38.5 | 61.5 | 4.3 | 39.0 | 61.0 | 0.0 | 13.9 | 4.5 | 0.0 |
| 10 | 4.6 | 38.9 | 36.3 | 4.5 | 10.6 | 29.9 | 70.1 | 9.7 | 32.3 | 67.7 | 0.0 | 35.4 | 8.8 | 0.2 |
| 11 | 5.4 | 14.9 | 1.3 | 2.5 | 35.8 | 28.5 | 71.5 | 44.6 | 21.7 | 65.0 | 13.3 | 42.8 | 18.5 | 0.2 |
| ASCs, antibody-secreting cells; DN, double-negative (IgD-CD27-); NT, not tested | | | | | | | | | | | | | | |
